# Supplementary material
Source: publisher figshare collection journal article supplement (https://sage.figshare.com/ndownloader/files/12375404)
Supplement: Supplementary file 1 [file 12375404]

**Appendix**

Table A1 Full survey and analytical sample profiles

|  | Full sample | Catholic model sample | Protestant model sample |
| --- | --- | --- | --- |
| Female | 52.2 | 51.8 | 51.7 |
| Age (mean) | 47.3 | 46.4 | 50.6 |
| *Education* |  | | |
| Higher qualification | 19.6 | 16.5 | 16.3 |
| Secondary qualification | 27.2 | 32.1 | 26.5 |
| Intermediate qualification | 30.3 | 30.9 | 28.4 |
| No qualification | 22.8 | 20.6 | 28.8 |
| *Party identification* |  | | |
| DUP | 16.0 | - | 36.6 |
| UUP | 6.4 | - | 14.9 |
| SF | 16.6 | 44.7 | - |
| SDLP | 6.2 | 15.0 | - |
| No party | 54.7 | 40.3 | 48.5 |
| *Religious attendance* |  | | |
| Practising | 29.6 | 37.1 | 29.1 |
| Irregular practising | 31.4 | 34.4 | 34.3 |
| Non-practising | 39.1 | 28.5 | 36.6 |
| Faith - believer | 40.2 | 36.8 | 52.2 |

Note: original question codings for party identification, religious attendance and faith at the end of the appendix.

Table A2 “Gay marriage should be made legal in Northern Ireland” (%)

|  | Roman  Catholic | Protestant | No Religion | Attend church once a week or more | Attend church 2 or 3 times a month | Attend church once a month | Attend church several times per year | Attend church less frequently than several times per year | Never attend church | Atheist (1) | Agnostic (2-5) | Believer (6) | DUP support | UUP support | SDLP support | Sinn Féin support |
| --- | --- | --- | --- | --- | --- | --- | --- | --- | --- | --- | --- | --- | --- | --- | --- | --- |
| Strongly Agree | 26.6 | 25.9 | 36.9 | 11.5 | 22.0 | 30.6 | 31.7 | 31.2 | 31.5 | 42.9 | 28.2 | 22.0 | 18.9 | 15.4 | 21.0 | 25.4 |
| Agree | 39.9 | 14.9 | 30.9 | 20.2 | 23.9 | 26.6 | 30.1 | 28.4 | 28.1 | 27.3 | 31.9 | 19.3 | 12.7 | 19.2 | 35.0 | 51.1 |
| Neither Agree/ Disagree | 11.5 | 14.8 | 13.4 | 9.1 | 16.9 | 11.6 | 12.9 | 13.8 | 12.3 | 15.6 | 14.9 | 10.9 | 13.9 | 12.5 | 10.0 | 7.8 |
| Disagree | 10.2 | 12.2 | 4.0 | 15.2 | 11.0 | 11.0 | 11.5 | 9.1 | 5.0 | 5.2 | 9.1 | 12.3 | 13.9 | 18.3 | 16.0 | 7.1 |
| Strongly Disagree | 10.0 | 24.5 | 7.4 | 37.9 | 21.2 | 16.2 | 10.1 | 11.3 | 15.4 | 3.9 | 10.0 | 30.0 | 35.5 | 27.9 | 14.0 | 7.1 |
| Don’t know | 1.9 | 6.9 | 6.0 | 6.2 | 4.7 | 4.1 | 3.7 | 5.0 | 6.9 | 3.9 | 5.5 | 4.5 | 4.6 | 6.7 | 4.0 | 1.5 |
| Refused | 0.0 | 0.7 | 1.3 | 0.0 | 0.4 | 0.0 | 0.0 | 1.3 | 0.8 | 1.3 | 0.5 | 1.0 | 0.4 | 0.0 | 0.0 | 0.0 |
| N | 629 | 811 | 149 | 243 | 255 | 173 | 356 | 298 | 260 | 77 | 972 | 706 | 259 | 104 | 100 | 268 |

Source: 2015 Northern Ireland General Election survey

Note: original question codings for party identification, religious attendance and faith at the end of the appendix.

Table A3 “Abortion should be made legal in Northern Ireland” (%)

|  | Roman  Catholic | Protestant | No Religion | Attend church once a week or more | Attend church 2 or 3 times a month | Attend church once a month | Attend church several times per year | Attend church less frequently than several times per year | Never attend church | Atheist (1) | Agnostic (2-5) | Believer (6) | DUP support | UUP support | SDLP support | Sinn Féin support |
| --- | --- | --- | --- | --- | --- | --- | --- | --- | --- | --- | --- | --- | --- | --- | --- | --- |
| Strongly Agree | 16.2 | 27.9 | 32.9 | 5.8 | 16.5 | 31.2 | 28.7 | 27.9 | 29.6 | 41.6 | 28.0 | 14.7 | 23.2 | 16.4 | 11.0 | 14.6 |
| Agree | 23.4 | 19.2 | 24.2 | 16.5 | 18.8 | 15.0 | 25.6 | 22.9 | 25.4 | 20.8 | 25.7 | 16.2 | 17.0 | 24.0 | 21.0 | 29.9 |
| Neither Agree/ Disagree | 23.5 | 13.1 | 12.8 | 17.7 | 20.0 | 19.7 | 14.6 | 17.1 | 16.2 | 11.7 | 17.1 | 17.4 | 10.4 | 15.4 | 23.0 | 25.8 |
| Disagree | 16.2 | 10.4 | 8.7 | 18.1 | 13.7 | 13.9 | 12.1 | 10.6 | 7.3 | 13.0 | 10.5 | 14.2 | 11.2 | 17.3 | 20.0 | 14.6 |
| Strongly Disagree | 15.6 | 20.7 | 8.1 | 34.6 | 23.1 | 15.6 | 12.6 | 13.3 | 10.4 | 6.5 | 9.9 | 30.2 | 32.1 | 21.2 | 18.0 | 12.7 |
| Don’t know | 4.9 | 8.4 | 11.4 | 7.0 | 7.8 | 4.1 | 6.5 | 7.3 | 10.8 | 5.2 | 8.4 | 6.7 | 6.2 | 4.8 | 7.0 | 2.6 |
| Refused | 0.2 | 0.4 | 2.0 | 0.4 | 0.0 | 0.6 | 0.0 | 1.0 | 0.4 | 1.3 | 0.4 | 0.7 | 0.0 | 1.0 | 0.0 | 0.0 |
| N | 629 | 811 | 149 | 243 | 255 | 173 | 356 | 398 | 260 | 77 | 972 | 706 | 259 | 104 | 100 | 268 |

Source: 2015 Northern Ireland General Election survey

Note: original question codings for party identification, religious attendance and faith at the end of the appendix

Original question codings for key explanatory variables

*Faith*

“Which of these statements comes closest to expressing what you believe about God?”

1 ‘I don’t believe in God’

2 ‘I don’t know whether there is a God and I don’t believe there is any way to find out’

3 ‘I don’t believe in a personal God but I believe in a Higher Power of some kind’

4 ‘I find myself believing in God some of the time but not at others’

5 ‘Whilst I have doubts I feel that I do believe in God’

6 ‘I know God really exists and have no doubts’.

*Party identification / support*

C9 “Generally speaking, do you think of yourself as a supporter of any one political party?”

[If NO to C9 ] C10 “Do you think of yourself as a little closer to one party than to others?”

[If YES to C9 or C10] C11”Which party?” [closed list of Northern Ireland parties]

*Religious attendance*

“Apart from special occasions such as weddings, funerals, baptisms and so on, how often nowadays do you attend services or meetings connected with your religion?”

1 Once a week or more

2 2 or 3 times a month

3 Once a month

4 Several times a year

5 Less frequently

6 Never

7 Don’t have a religion
